# Supplementary material for: Circulating platelet-neutrophil aggregates characterize the development of type 1 diabetes in humans and NOD mice
Source: JCI journal article supplement (doi:10.1172/jci.insight.153993), 2022-01-24
Supplement: sd1 [file 1]

## **SUPPLEMENTAL MATERIAL**

### **Supplemental Method**

**Treatment of NOD mice with mCBS.** NOD female mice at 2 weeks or 10-12 weeks of age were treated with mCBS (10 mg/ml stock in saline) at 50 mg/kg/day i.p. or 5  $\mu$ l saline (diluent control)/g body weight/day i.p. for 6 weeks. The mice were weighed 1 x (adults) – 2 x (neonates/young mice)/week and the volumes of mCBS and saline for injection were adjusted accordingly. Onset of T1D was monitored until the mice reached 28-29 weeks of age (see Methods section). Diabetic mice and mice that did not become diabetic by 28-29 weeks of age were ethically terminated by cervical dislocation.

## Supplemental Tables

**Supplemental Table 1** Demographics for pediatric donors

|                            | HC        | Aab neg   | Aab pos                   | T1D Onset | T1D <1 yr |
|----------------------------|-----------|-----------|---------------------------|-----------|-----------|
| Age, median (n)            | 13.5 (46) | 13.0 (19) | 11.4 (17) <sup>***</sup>  | 11.3 (34) | 12.5 (6)  |
| Sex Female % (n)           | 50.0 (23) | 57.9 (11) | 35.3 (6) <sup>**</sup>    | 23.5 (8)  | 33.3 (2)  |
| N Aab                      |           |           |                           |           |           |
| 0, % (n)                   | 100 (20)  | 100 (19)  | 0 (0)                     | 2.9 (1)   | na        |
| 1, % (n)                   |           |           | 35.3 (6) <sup>*</sup>     | 17.6 (6)  | na        |
| 2, % (n)                   |           |           | 29.4 (5) <sup>**</sup>    | 23.5 (8)  | na        |
| 3, % (n)                   |           |           | 23.5 (4)                  | 41.2 (14) | na        |
| 4, % (n)                   |           |           | 11.8 (2)                  | 14.7 (5)  | na        |
| 5, % (n)                   |           |           | 0 (0)                     | 0 (0)     | na        |
| Type of Aab                |           |           |                           |           |           |
| GAD65, % (n)               |           |           | 94.1% (16) <sup>***</sup> | 79.4 (27) | na        |
| ZnT8, % (n)                |           |           | 41.2% (7) <sup>*</sup>    | 73.6 (25) | na        |
| IA2, % (n)                 |           |           | 17.6% (3)                 | 67.6 (23) | na        |
| ICA, % (n)                 |           |           | 29.4% (5) <sup>*</sup>    | na        | na        |
| IAA, % (n)                 |           |           | 29.4% (5)                 | 26.5 (9)  | na        |
| HbA1c mmol/mol median (n)  | na        |           | 32.0 (10) <sup>*</sup>    | 99.5 (34) | 51.0 (4)  |
| HbA1c % median (n)         | na        |           | 5.1 (14) <sup>**</sup>    | 11.1 (34) | 6.8 (4)   |
| c-peptide ng/ml median (n) | na        |           | 1.48 (11) <sup>**</sup>   | 0.43 (33) | na        |
| HLA (DR3 or DR4) % (n)     | na        |           | 73.7 (14)                 | 83.3 (10) | na        |

\* Includes 1 repeated measure

\*\* Includes 2 repeated measures

\*\*\* Includes 3 repeated measures

**Supplemental Table 2** Antibodies used for flow cytometry analysis of mouse blood

| Antibody                                         |            |             | Source           | Final conc.<br>(dilution) |
|--------------------------------------------------|------------|-------------|------------------|---------------------------|
| Name                                             | Code       | Stock conc. |                  |                           |
| Rat anti-mouse CD16/CD32<br>(mouse Fc block)     | 553142     | 0.5 mg/ml   | BD Biosciences   | 2.3 µg/ml<br>(1/215)      |
| Rat anti- mouse CD45.1-APC,<br>clone A20         | 17-0453-81 | 0.2 mg/ml   | eBioscience      | 2 µg/ml<br>(1/100)        |
| Hamster anti-mouse CD11c-<br>PE CF594, clone HL3 | 562454     | 0.2 mg/ml   | BD Horizon       | 2 µg/ml<br>(1/100)        |
| Rat anti-mouse CD11b-AF700,<br>clone M1/70       | 557960     | 0.2 mg/ml   | BD Biosciences   | 2 µg/ml<br>(1/100)        |
| Rat anti-mouse LY6C-BV605<br>clone AL-21         | 563011     | 0.2 mg/ml   | BD Biosciences   | 2 µg/ml<br>(1/100)        |
| Rat anti-mouse Ly6G-PE-Cy7<br>clone IA8          | 560601     | 0.2 mg/ml   | BD Biosciences   | 2 µg/ml<br>(1/100)        |
| Rat anti-mouse CD41-FITC<br>clone MWRReg30       | 553848     | 0.5 mg/ml   | BD Biosciences   | 5 µg/ml<br>(1/100)        |
| Rat anti-mouse CD62P-PE<br>clone Wug.E9          | M130-2     | N/A         | Emfret Analytics | (1/100)                   |

**Supplemental Table 3** Antibodies used for flow cytometry analysis of human blood

| Antibody                                                     |          |             | Source         | Final conc.<br>(dilution) |
|--------------------------------------------------------------|----------|-------------|----------------|---------------------------|
| Name                                                         | Code     | Stock conc. |                |                           |
| Mouse anti-human CD15-V450                                   | 561584   | 0.025 mg/ml | BD Biosciences | 0.6 µg/ml<br>(1/40)       |
| Mouse anti-human CD16-PE-Cy7                                 | 557744   | 0.4 mg/ml   | BD Biosciences | 10 µg/ml<br>(1/40)        |
| Mouse anti-human CD41-PE                                     | ab134372 | 0.02 mg/ml  | Abcam          | 1.7 µg/ml<br>(1/12)       |
| Mouse anti-human CD62P (P-,<br>selectin)<br>- PerCP-Cy5.5 or | 304923   | 0.1 mg/ml   | Biologend      | 2.5 µg/ml<br>(1/40)       |
| - AF647                                                      | 304918   | 0.1 mg/ml   | Biologend      | 2.5 µg/ml<br>(1/40)       |

**Supplemental Table 4** Antibodies used for immunofluorescence staining

| Primary and secondary antibodies                     |        |             | Source         | Final conc.         |
|------------------------------------------------------|--------|-------------|----------------|---------------------|
| Name                                                 | Code   | Stock conc. |                |                     |
| Goat anti-mouse MPO                                  | AF3667 | 0.2 mg/ml   | RnD Systems    | 10 µg/ml<br>(1/20)  |
| Rabbit anti- mouse histone H3 (citrulline R2+R8+R17) | ab5103 | 1 mg/ml     | Abcam          | 5 µg/ml<br>(1/200)  |
| Rat anti-mouse Ly6G clone IA8                        | 551459 | 0.5 mg/ml   | BD Biosciences | 10 µg/ml<br>(1/50)  |
| Donkey anti-goat IgG AF568                           | A11057 | 2 mg/ml     | ThermoFisher   | 4 µg/ml<br>(1/500)  |
| Donkey anti-goat IgG AF488                           | A11055 | 2 mg/ml     | ThermoFisher   | 10 µg/ml<br>(1/200) |
| Donkey anti-rabbit IgG AF568                         | A10042 | 2 mg/ml     | ThermoFisher   | 4 µg/ml<br>(1/500)  |
| Donkey anti-rat IgG AF488                            | A21208 | 2 mg/ml     | ThermoFisher   | 4 µg/ml<br>(1/500)  |

## Supplemental Figures

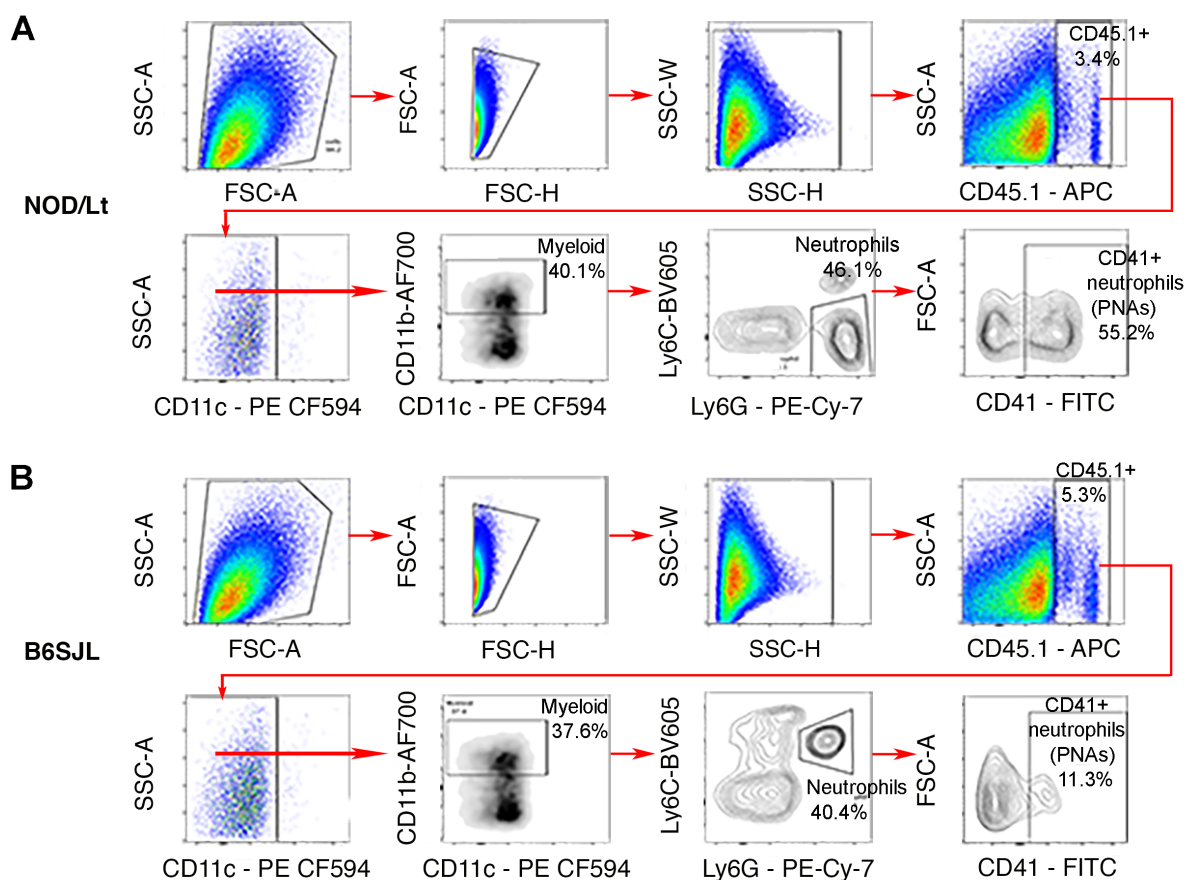

**Supplemental Figure 1. Gating strategy for flow cytometry analysis of mouse PNAs.** Representative FACs plots demonstrate initial identification of CD45.1+ leukocytes, followed by CD11c-/CD11b+ myeloid cells, Ly6C+/Ly6G+ neutrophils and finally, CD41 (platelet-specific marker)+ neutrophils, i.e. PNAs in **(A)** 10-12 wk pre-T1D NOD blood and **(B)** 6-8 week B6SJL blood analysed in the same assay. Note that Ly6C is expressed at lower levels on **(A)** NOD/Lt neutrophils (82, 83) compared to **(B)** B6SJL neutrophils.

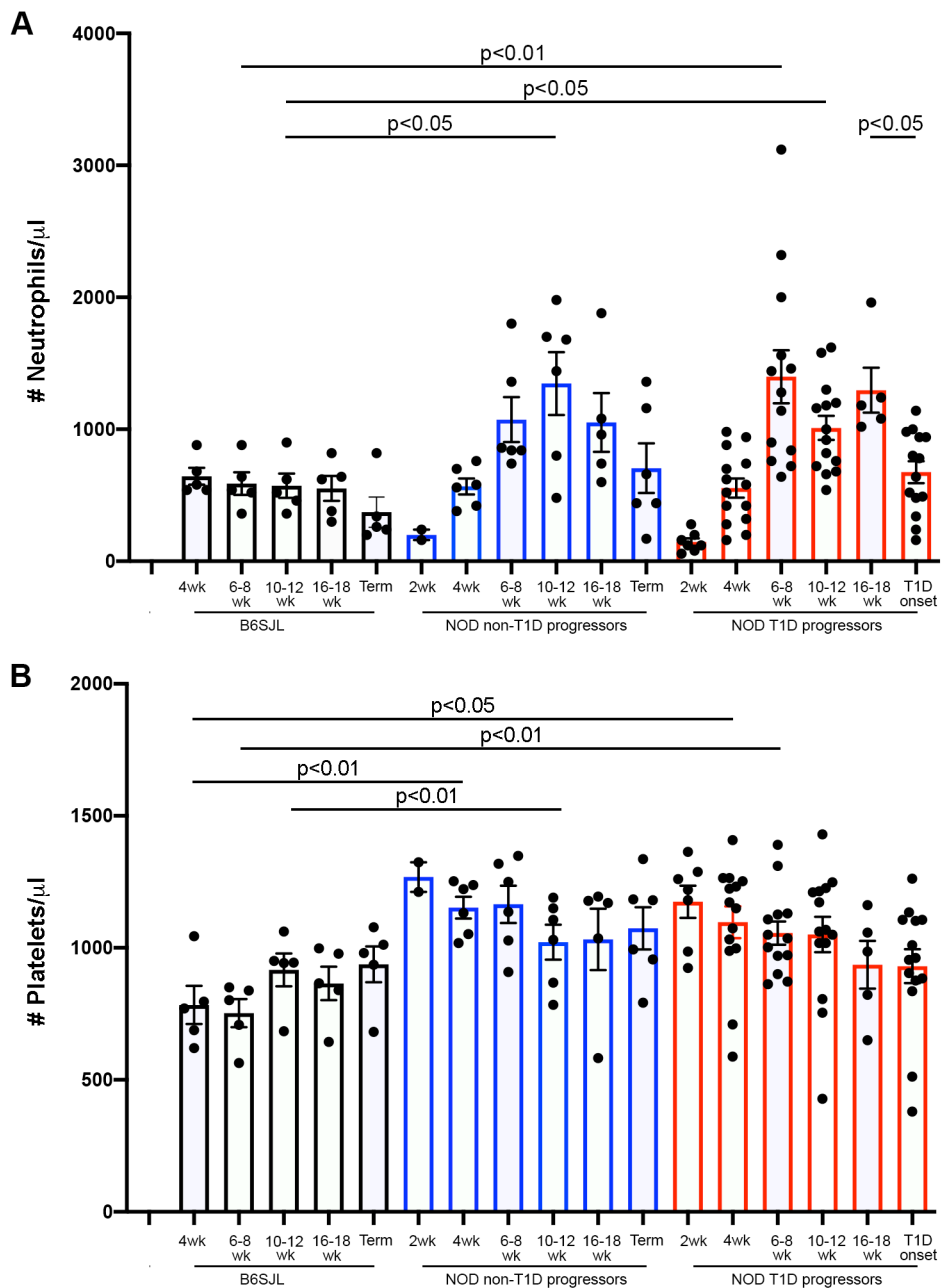

**Supplemental Figure 2. Longitudinal analysis of circulating neutrophils and platelets in NOD T1D progressors and non-progressors.** Bar graphs show repeated (A) neutrophil counts and (B) platelet counts in the same mice from 2wks of age (n= 9 NOD females) and from 4 wks of age (n=20 NOD females) to T1D onset or termination (25-28 weeks of age); B6SJL females were monitored from 4 wks of age only (n=5). Data shows mean  $\pm$  SEM; Mixed effects analysis with Tukey's (between groups) and Dunnett's (within group) multiple comparisons tests.

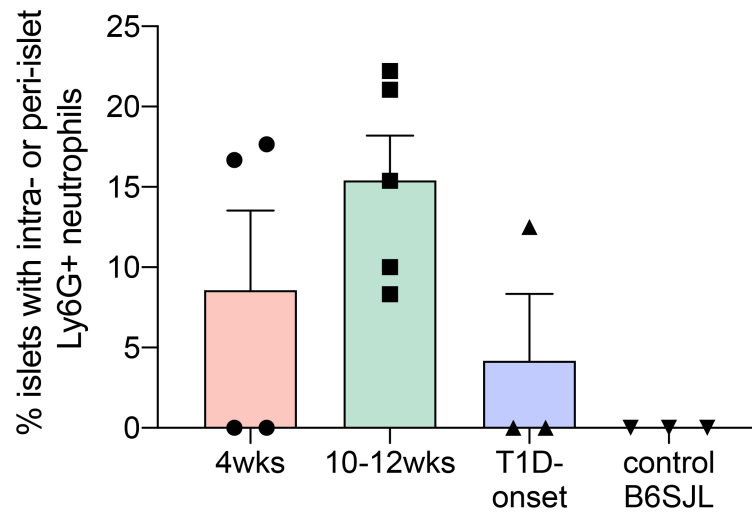

**Supplemental Figure 3. Frequency of intra-islet and/or peri-islet Ly6G+ neutrophils in NOD pancreas during T1D development.** Bar graphs include islets with Ly6G+ neutrophils within ~ 50  $\mu$ m from the islet boundary. 1-2 pancreas sections were stained per sample. B6SJL islets were examined as non-autoimmune controls. Data shows mean  $\pm$  SEM; n=3-5 pancreata/group; n=19-63 islets examined/group. No significant differences were found between the groups; One-way ANOVA with Tukey's multiple comparisons test.



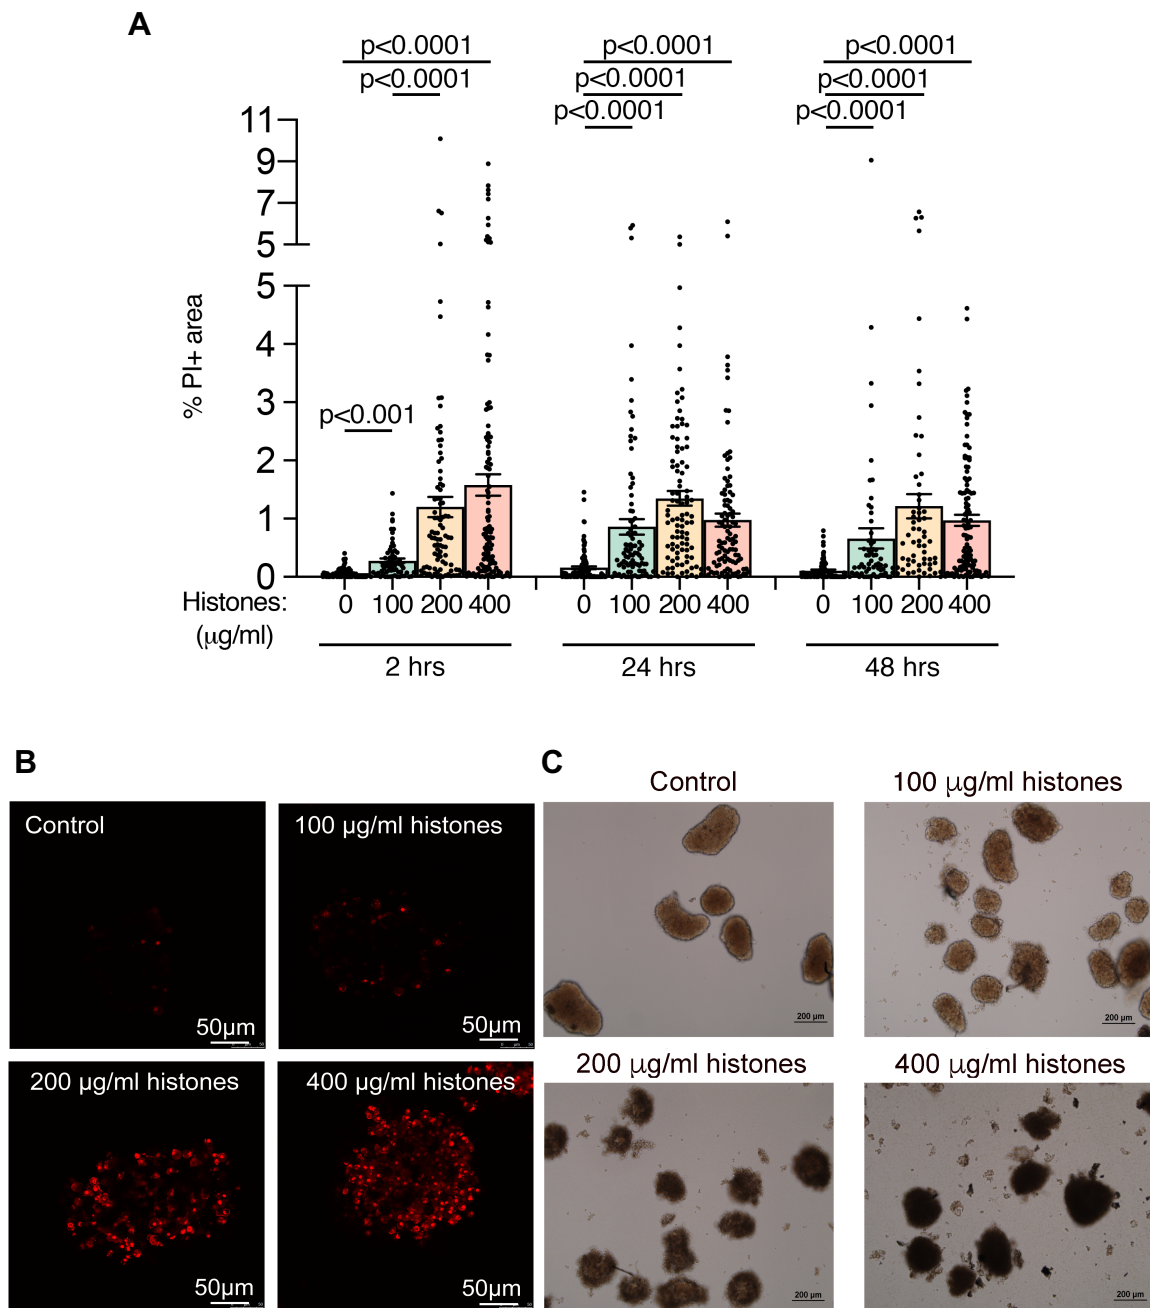

**Supplemental Figure 4. Histones damage mouse islets in vitro.** (A) BALB/c islets were cultured with calf thymus histones (100-400  $\mu\text{g/ml}$ ) or culture medium (control) for 2, 24 and 48 hrs ( $n=3$  expts/group,  $n=15-29$  islets/group/expt), labelled with PI and imaged by confocal microscopy; islet cell death (% PI+ islet area) was analysed using morphometry and Image J software. The data show mean  $\pm$  SEM; non-parametric ANOVA with Kruskal-Wallis test and Dunn's multiple comparisons test. The data reveal early toxicity particularly after 2 hours of treatment with 200-400  $\mu\text{g/ml}$  of histones. Representative (B) confocal and (C) macroscopic images show that BALB/c islets cultured for 2 hrs with histones showed greatly increased PI+ islet cell death (red fluorescent staining; (B)) and damaged periphery, dark appearance and surrounding cell debris after treatment with 200-400  $\mu\text{g/ml}$  histones (C), compared to untreated islets. Images in (B) show the second focal planes of Z-stack (30  $\mu\text{m}$  intervals). Scale bar: 50  $\mu\text{m}$  in (B); scale bar: 200  $\mu\text{m}$  in (C).

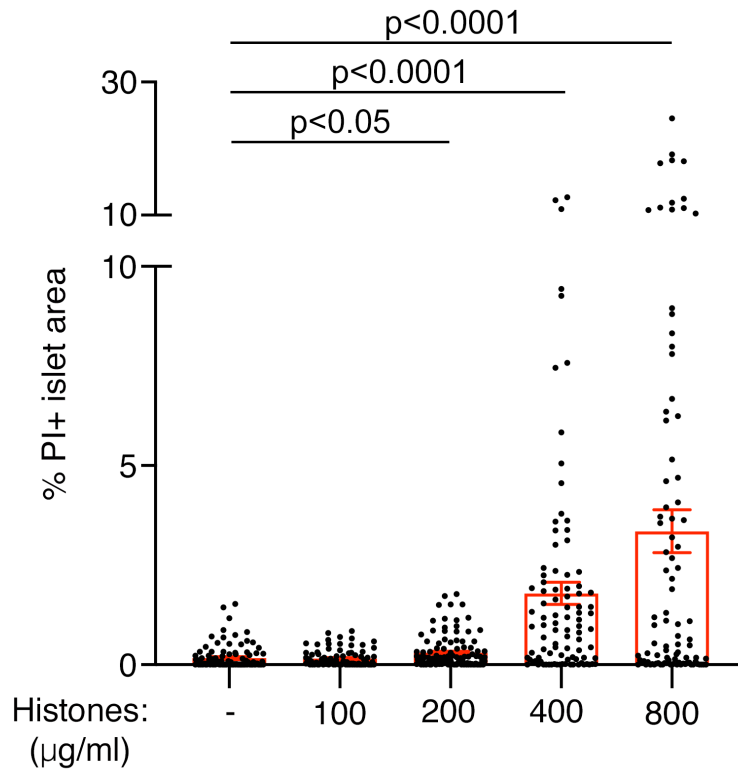

**Supplemental Figure 5. Histone titration on mouse islets to identify maximal islet damage.** Mouse islets treated for 2 hrs with 100-800 µg/ml of calf thymus histones show maximum islet damage (% PI+ islet area) with 800 µg/ml of histones. Data show mean ± SEM of the islets examined in each group; n=2 expts, n=18-20 islets/group, n=4-7 focal planes at 30 µm intervals examined from a Z-stack for each islet, acquired by confocal microscopy; non-parametric ANOVA with Kruskal-Wallis test and Dunn's multiple comparisons test.

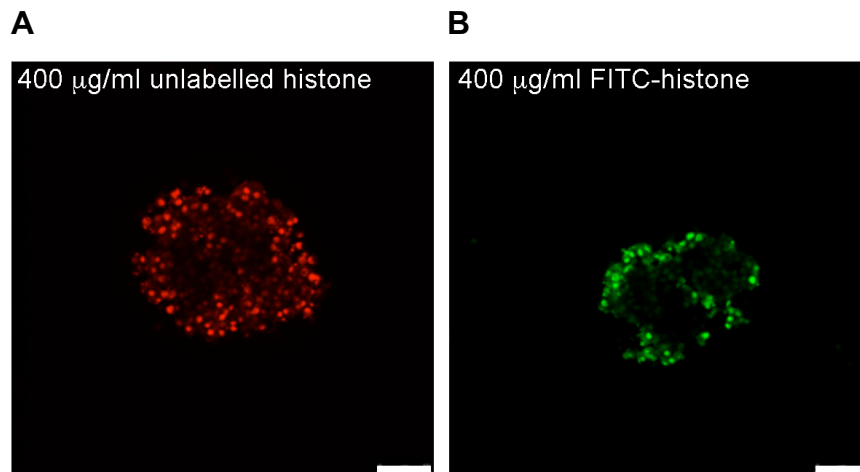

**Supplemental Figure 6. Histone penetration into human islets.** Representative confocal images of isolated human islets treated with 400 µg/ml unlabelled (**A**) and FITC-labelled (green fluorescent) (**B**) histones demonstrate that the peripheral staining of islets for FITC-histones (**B**) is consistent with the PI+ (red fluorescent) islet area routinely observed at the islet periphery after histone treatment (also see Figure 3B). Scale bar: 50 µm.

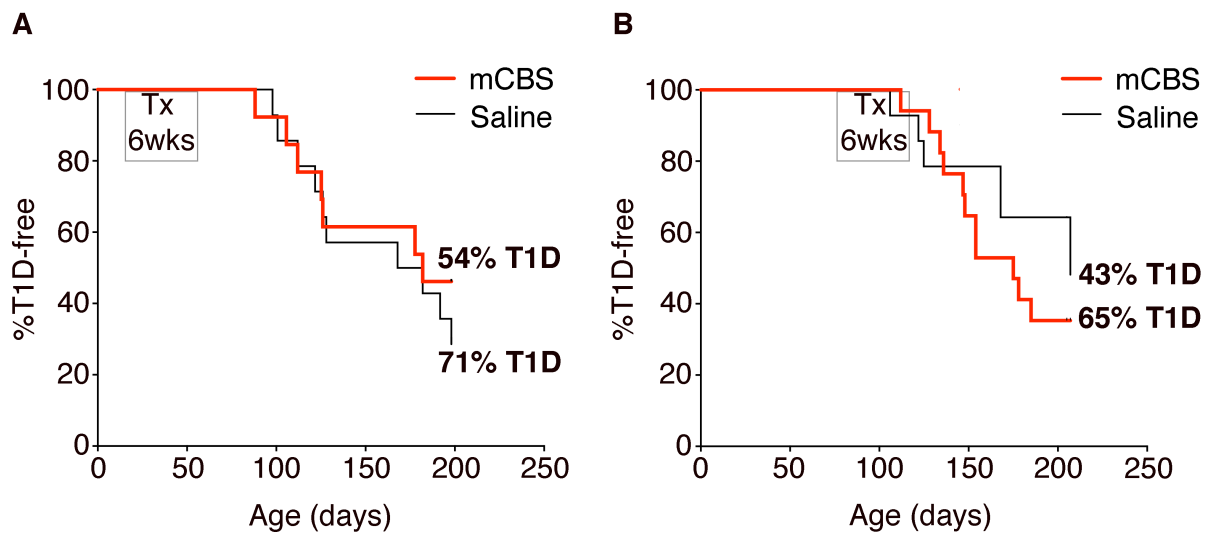

**Supplemental Figure 7. T1D incidence in NOD females treated with mCBS or saline from 2 and 10-12 weeks of age.** (A) T1D incidence was monitored in NOD females treated from 2 wks of age with mCBS (50 mg/kg/day i.p.; n=13; red) or i.p. saline (n= 14; black) for 6 weeks. (B) T1D incidence in 10-12 week NOD females after treatment with 50 mg/kg/day i.p. mCBS for 6 weeks (n=17; red) or saline-treated mice (n=14; black). Data is presented as percentage of mice that remained T1D-free. There were no significant differences observed between the treated groups for each age group, Fishers Exact test. Tx, treatment duration.

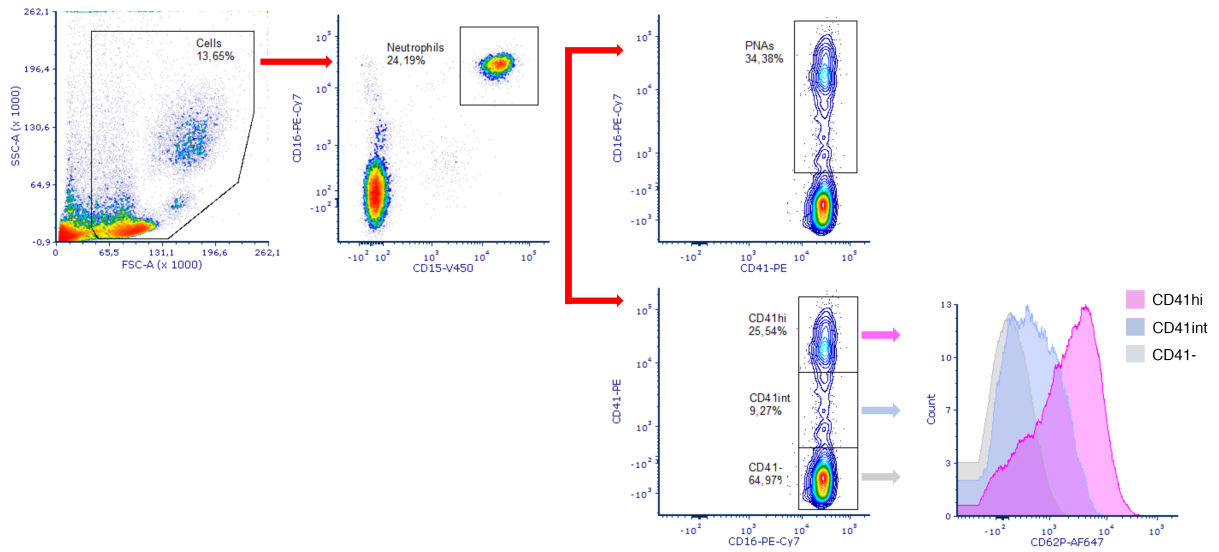

**Supplemental Figure 8. Gating strategy for identifying PNAs in human peripheral blood.** Neutrophils were identified as CD15+CD16+ cells in total leukocytes. The frequency of PNAs in total neutrophils is calculated as the percentage of CD41+ neutrophils. In some experiments, to assess the level of platelet activation in PNAs, the expression of the platelet activation marker CD62P was tested. A representative histogram shows CD62P expression levels on CD41- neutrophils (grey), CD41 intermediate PNAs (CD41int; blue) and CD41 high PNAs (CD41hi; pink).
